# Supplementary material for: Specific configurations of electrical synapses filter sensory information to drive choices in behavior
Source: PubMed Central journal article supplement — bioRxiv. 2023 Aug 3:2023.08.01.551556. Preprint. [Version 1] doi: 10.1101/2023.08.01.551556 (PMC10418224; doi:10.1101/2023.08.01.551556), 2023-08-03

**A****Behavioral Choice Assays**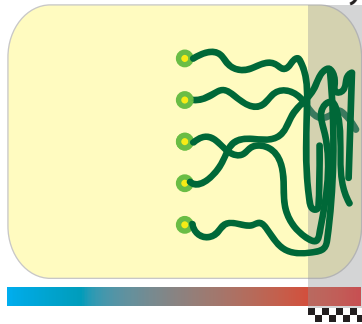**Isothermal Tracking Assays**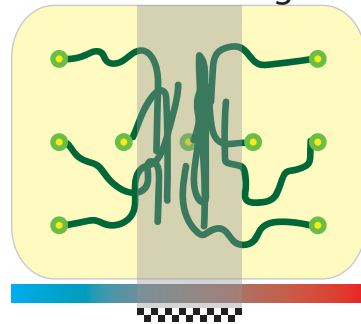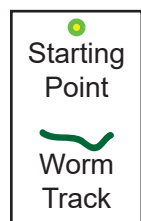**B**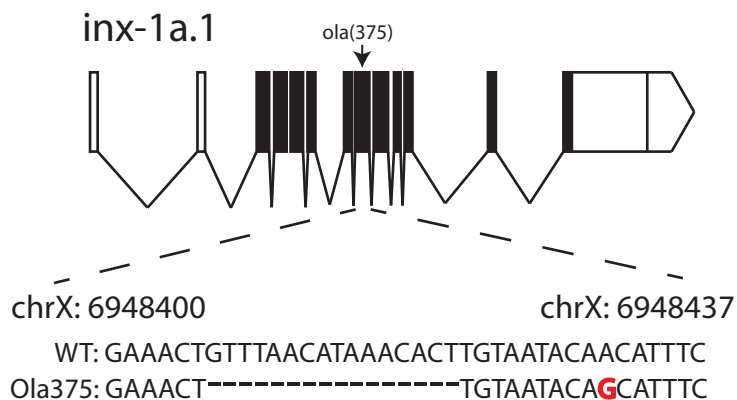**C**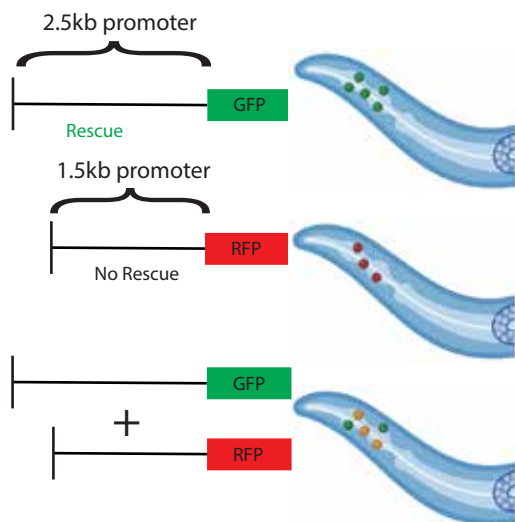**D**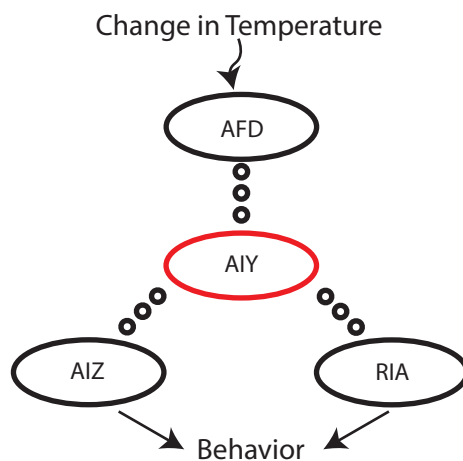**E**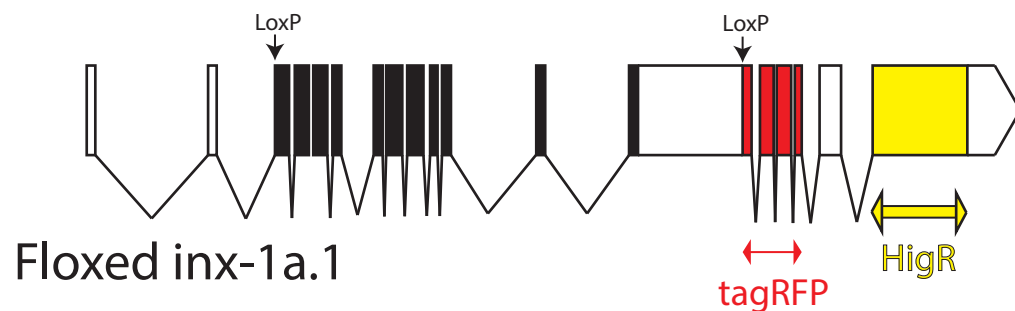

Supplement: media-1.pdf [file media-1.pdf]
