# Supplementary material for: Specific configurations of electrical synapses filter sensory information to drive choices in behavior
Source: PubMed Central journal article supplement — bioRxiv. 2023 Aug 3:2023.08.01.551556. Preprint. [Version 1] doi: 10.1101/2023.08.01.551556 (PMC10418224; doi:10.1101/2023.08.01.551556), 2023-08-03
Supplement: NIHPP2023.08.01.551556v1-supplement-6.pdf [file NIHPP2023.08.01.551556v1-supplement-6.pdf]

## 601 **Supplementary Figure Legends**

### 602 **Supplementary Figure 1. Strategies, strains and constructs related to Figure 1. A.**

603 Schematic of thermotaxis assays and behavior. (Left) Schematic of the behavioral choice  
604 assays used in most studies, in which animals are placed at the middle of the gradient,  
605 and allowed to migrate towards their preferred temperature region (shaded grey), where  
606 they perform isothermal tracking. (Right) Schematic of the assay using in this study, in  
607 which animal start sites (circles) were placed in an “H” configuration and trained to prefer  
608 20C (shaded area in middle of assay), as to better capture behaviors of animals  
609 performing gradient migration up or down the gradient as they transition into isothermal  
610 tracking. **B.** Schematic and sequence information for the *inx-1(ola375)* allele isolated in  
611 this study from forward genetic screens. **C.** Schematic of the subtractive labeling  
612 strategy to identify the INX-1 site of action. A promoter fragment of 2.5kb can drive  
613 expression of *inx-1* cDNA and rescue the observed thermotaxis defects for the *inx-1*  
614 mutants, while a promoter fragment of 1.5 kb is insufficient to do so. By creating  
615 transcriptional fusions of both promoter fragments, we identified candidate neurons which  
616 are uniquely labeled by the rescuing promoter fragment. **D.** Schematic of part of the  
617 thermotaxis circuit, highlighting the AIY interneuron position as the primary interneurons  
618 downstream of the thermosensory neuron AFD. **E.** Schematic of *inx-1(ola278)* a floxed  
619 allele engineered for conditional knockdowns of the *inx-1* gene.

### 620 **Supplementary Figure 2. Examination of AIY coupling by INX-1, related to Figure 3.**

621 GCaMP6 signal strength over time in clamped AIY (AIY<sub>c</sub>) and unclamped AIY (AIY<sub>uc</sub>) of  
622 wild type (A and C) and the *inx-1* mutants (B and D). Shown here are results of individual

623 animals normalized by the peak fluorescent signal of AIY<sub>c</sub>. C and D are the same as  
624 Figure 3 C and D, and represent the cumulative results of the individual animals.

625 **Supplementary Figure 3. Thermotaxis modeling parameterization and Pearson**  
626 **coefficient firing between AIY pairs. A.** Data from a freely moving animal during a  
627 straight run, displaying the position of the nose tip (dots) and fit with a sinusoidal curve.  
628 **B.** Histogram of the speeds of runs of animals trained at 25C and placed at 20C, and  
629 moving up the gradient towards their preferred temperature, with a lognormal fit (in red).  
630 **C.** Pearson's coefficient in AIY pairs between wild-type animals (n = 8) and *inx-1(tm3524)*  
631 (n = 7). Values are shown as mean ± SE. the asterisks \*\*\* denote  $p < 0.0005$  from two-  
632 tailed Mann-Whitney test.

### 633 **Supplemental Movies.**

634 **Movie 1.** Calcium responses of AIYs (ventral view) in wild type animals stimulated by  
635 simulated isotherm (+/- 0.01°C oscillations surrounding T<sub>c</sub>, 20°C, related for Figure 4D)

636 **Movie 2.** As Movie 1, but in *inx-1(tm3524)* mutants.

### 637 **Supplemental Strain Table.**

| Strain         | Genotype                                                                                                   | Source     |
|----------------|------------------------------------------------------------------------------------------------------------|------------|
| <i>N2</i>      | Bristol wild-type strain                                                                                   | CGC        |
| <i>CB4856</i>  | Hawaiian wild-type strain                                                                                  | CGC        |
| <i>DCR3056</i> | <i>olals17 [Pmod-1::GCaMP6s (25ng/ul), Pttx-3::mCherry (25ng/ul), Punc-122::dsRed (40ng/ul)] I</i>         | (57)       |
| <i>DCR3542</i> | <i>pkc-1(nj1) V; inx-1(ola375) X</i>                                                                       | This study |
| <i>DCR3682</i> | <i>inx-1(tm3524) X; olaEx2136[Pinx-1(2.5kb)::INX-1gene::SL2::GFP (10 ng/ul), Punc-122::RFP (35 ng/ul)]</i> | This study |

|         |                                                                                                                                                                                                                                                                               |            |
|---------|-------------------------------------------------------------------------------------------------------------------------------------------------------------------------------------------------------------------------------------------------------------------------------|------------|
| DCR4116 | <i>olaEx2390</i> [ <i>Pinx-1</i> (2.5kb):: <i>GFP</i> , <i>Pinx-1</i> (1.5kb):: <i>mCherry</i> , <i>Punc-122</i> :: <i>GFP</i> ]                                                                                                                                              | This study |
| DCR4466 | <i>olals17</i> [ <i>Pmod-1</i> :: <i>GCaMP6s</i> (25ng/ul), <i>Pttx-3</i> :: <i>mCherry</i> (25ng/ul), <i>Punc-122</i> :: <i>dsRed</i> (40ng/ul)] I; <i>inx-1(tm3524)</i> X                                                                                                   | This study |
| DCR4708 | <i>inx-1(ola278)</i> X                                                                                                                                                                                                                                                        | This study |
| DCR4984 | <i>inx-1(ola278)</i> X; <i>olaEx2943</i> [ <i>Pinx-1</i> (2.5kb):: <i>nCRE</i> (25 ng/ul), <i>Punc-122</i> :: <i>RFP</i> ]                                                                                                                                                    | This study |
| DCR4990 | <i>inx-1(ola278)</i> X; <i>olaEx2949</i> [ <i>Pinx-1</i> (1kb):: <i>nCRE</i> (25 ng/ul), <i>Punc-122</i> :: <i>RFP</i> ]                                                                                                                                                      | This study |
| DCR4995 | <i>tmls777</i> [ <i>Prgef-1</i> :: <i>cre</i> , <i>Punc-119</i> :: <i>venus</i> ]; <i>inx-1(ola278)</i> X                                                                                                                                                                     | This study |
| DCR5027 | <i>inx-1(ola278)</i> X; <i>olaEx2976</i> [ <i>Pcex-1</i> :: <i>nCRE</i> (25 ng/ul), <i>Punc-122</i> :: <i>RFP</i> ]                                                                                                                                                           | This study |
| DCR5030 | <i>inx-1(ola278)</i> X; <i>olaEx2979</i> [ <i>Podr-2b3a</i> :: <i>nCRE</i> (25 ng/ul), <i>Punc-122</i> :: <i>RFP</i> ]                                                                                                                                                        | This study |
| DCR5035 | <i>inx-1(ola278)</i> X; <i>olaex2984</i> [ <i>Pttx-3</i> :: <i>SL2</i> :: <i>nCRE</i> (25ng/ml), <i>Punc122</i> : <i>RFP</i> ] #1                                                                                                                                             | This study |
| DCR5036 | <i>inx-1(ola278)</i> X; <i>olaex2985</i> [ <i>Pttx-3</i> :: <i>SL2</i> :: <i>nCRE</i> (25ng/ml), <i>Punc122</i> : <i>RFP</i> ] #2                                                                                                                                             | This study |
| DCR5043 | <i>tmls1091</i> [ <i>Pttx-3</i> :: <i>nCRE</i> , <i>Plin-44</i> :: <i>GFP</i> ]; <i>inx-1(ola278)</i> X                                                                                                                                                                       | This study |
| DCR5080 | <i>olals17</i> [ <i>Pmod-1</i> :: <i>GCaMP6s</i> (25ng/ul), <i>Pttx-3</i> :: <i>mCherry</i> (25ng/ul), <i>Punc-122</i> :: <i>dsRed</i> (40ng/ul)] I; <i>inx-1(ola278)</i> X                                                                                                   | This study |
| DCR5087 | <i>olals17</i> [ <i>Pmod-1</i> :: <i>GCaMP6s</i> (25ng/ul), <i>Pttx-3</i> :: <i>mCherry</i> (25ng/ul), <i>Punc-122</i> :: <i>dsRed</i> (40ng/ul)] I; <i>inx-1(ola278)</i> X; <i>olaEx3023</i> [ <i>Pinx-1</i> (2.5kb):: <i>nCRE</i> (25 ng/ul), <i>Pmyo-3</i> :: <i>RFP</i> ] | This study |
| DCR5108 | <i>inx-1(ola278)</i> X; <i>olaEx3041</i> [ <i>Pceh-16</i> :: <i>nCRE</i> , <i>Punc-122</i> :: <i>RFP</i> ]                                                                                                                                                                    | This study |
| DCR5121 | <i>olals17</i> [ <i>Pmod-1</i> :: <i>GCaMP6s</i> (25ng/ul), <i>Pttx-3</i> :: <i>mCherry</i> (25ng/ul), <i>Punc-122</i> :: <i>dsRed</i> (40ng/ul)] I; <i>tmls1091</i> [ <i>Pttx-3</i> :: <i>nCRE</i> , <i>Plin-44</i> :: <i>GFP</i> ]; <i>inx-1(ola278)</i> X                  | This study |
| DCR5122 | <i>olals17</i> [ <i>Pmod-1</i> :: <i>GCaMP6s</i> (25ng/ul), <i>Pttx-3</i> :: <i>mCherry</i> (25ng/ul), <i>Punc-122</i> :: <i>dsRed</i> (40ng/ul)] I; <i>inx-1(ola278)</i> X; <i>olaEx3053</i> [ <i>Pinx-1</i> (2.5kb):: <i>nCRE</i> (25 ng/ul), <i>Pmyo-3</i> :: <i>RFP</i> ] | This study |
| DCR5281 | <i>inx-1(tm3524)</i> X outcrossed 6 times                                                                                                                                                                                                                                     | This study |
| DCR5282 | <i>inx-1(ola278)</i> X outcrossed 5 times                                                                                                                                                                                                                                     | This study |
| DCR5283 | <i>inx-1(gk580946)</i> X outcrossed 4 times                                                                                                                                                                                                                                   | This study |
| DCR5438 | <i>olals17</i> [ <i>Pmod-1</i> :: <i>GCaMP6s</i> (25ng/ul), <i>Pttx-3</i> :: <i>mCherry</i> (25ng/ul), <i>Punc-122</i> :: <i>dsRed</i> (40ng/ul)] I; <i>inx-1(gk580946)</i> X                                                                                                 | This study |

|         |                                                                                                                                                                                                 |                        |
|---------|-------------------------------------------------------------------------------------------------------------------------------------------------------------------------------------------------|------------------------|
| DCR5790 | <i>olals17 [Pmod-1::GCaMP6s (25ng/ul), Pttx-3::mCherry (25ng/ul), Punc-122::dsRed (40ng/ul)] I; olals72 [Pelt-7::mCherry (25ng/ul), Pttx-3::Cx36::mCherry (25ng/ul)]</i>                        | (57)                   |
| DCR7342 | <i>inx-1(ola375) X</i> outcrossed 1 time                                                                                                                                                        | This study             |
| DCR8285 | <i>olals72 [Pelt-7::mCherry (25ng/ul), Pttx-3::Cx36::mCherry (25ng/ul)]; inx-1(tm3524) X</i>                                                                                                    | This study             |
| DCR8945 | <i>olals17 [Pmod-1::GCaMP6s (25ng/ul), Pttx-3::mCherry (25ng/ul), Punc-122::dsRed (40ng/ul)] I; inx-1(tm3524) X; olaEx5354[Pttx-3::SL2::Cx36::mCherry (25ng/ul), Pelt-7::mCherry (25ng/ul)]</i> | This study             |
| DCR8946 | <i>olals17 [Pmod-1::GCaMP6s (25ng/ul), Pttx-3::mCherry (25ng/ul), Punc-122::dsRed (40ng/ul)] I; inx-1(tm3524) X; olaEx5355[Pttx-3::SL2::Cx36::mCherry (25ng/ul), Pelt-7::mCherry (25ng/ul)]</i> | This study             |
| DCR8947 | <i>inx-1(tm3524) X; olaEx5356[Pttx-3::SL2::Cx36::mCherry (25ng/ul), Pelt-7::mCherry (25ng/ul)]</i>                                                                                              | This study             |
| FX03524 | <i>inx-1(tm3524) X</i>                                                                                                                                                                          | Shohei Mitani/<br>NBRP |
| FX14215 | <i>tmls777[Prgef-1::cre, Punc-119::venus]</i>                                                                                                                                                   | Shohei Mitani/<br>NBRP |
| FX16643 | <i>tmls1091[Pttx-3::nCRE, Plin-44::GFP]</i>                                                                                                                                                     | Shohei Mitani/<br>NBRP |
| IK105   | <i>pkc-1(nj1) V</i>                                                                                                                                                                             | CGC                    |
| VC40335 | <i>inx-1(gk580946) X</i>                                                                                                                                                                        | CGC                    |

638

639 ***inx-1(ola278)* sequence (insertions in bold)**

640 gaggcacagtttgaaaataaattaaatttaattcatttgatgattttgtttctcttgaggcttaaaaatgataaacggtacaaa  
641 actacaaaaaaactccataagtctttattttcttaattttgaaattttatttcaaaatgcacaagatccatttatcatattatagttct  
642 tcatctcttttttaataatcctctttttgtgtttatcgggtccatacgtgctctcaacttttttcatttttgacttaaataagaaaagat  
643 ggcaataaaaaaattggccgaagagggcgatggacggatgaaaatctactaaaaggattataactcaattgatatgctct  
644 tcgggaggatctcctgacgagatggaaaagaagaagaagaagaagaagcttgatcgtttcatcggaaga  
645 gacgggtggacattagaccacgccccacagggaaaccttcgagttcatccacctctgtctgttaacatattgttttttcta  
646 gctctattttctccgcttctactgctacttttgataatttctatttctaagtctgatcattataagtatcatcctgaacatcgcaca  
647 ctaaacatcctcggc**ATAACTTCGTATAGCATAACATTATACGAAGTTAT**cggcacggatgaagta  
648 gttttcattgcagttctgtccgccggaATGCTTCTATATTATCTGGCGGCCATATTCAAGGGCTTA  
649 CATCCGCGAGTCGACGACGATTTTGTGGACAAGCTCAATTATCACTATACTTCTGC  
650 TATTATATTCGCGTTTGCGATTATTGTGTCTGCCAAGCAGTACGTAGgtaagtctgatttcat  
651 taattcagcttctctgcgctaccttttcacgtaaaatcaattactttcagGTTATCCGATACAATGTTGGGTG  
652 CCTGCGCAGTTCACCGATGCTTGGGAACAGTACACCGAAAACACTATTGTTGGGTGG

653 AAAACACATACTACCTCCCGTTAACAAAGTGCATTTCCATTAGAATACGGTGACAGG  
654 AGgtaatttaaacattcaagcttattcagaaacttttctgttacagGGCACGACAAATCAGTTACTATCAA  
655 TGGGTGCCGTTTGTGTTAGCGCTCGAAGCGTTATGTTTCTACATCCCGTGCATAAT  
656 GTGGAGAGGACTGCTGCACTGGCATTCTGgtaagataatgaaacgggagatgaaaccaagaaa  
657 aaagaactccaactgacgatattggtcgttaaaaccgcacaactgtgcaatctgtgtgtctgtgtatacgtatgtgcca  
658 ggctgagatgatgaaaagaatgaaaaagaaaagaaagtagtctagagaaaagtaagtgtgaagtggagaggcga  
659 tccattaataatttattgcctaacgattctagagaaacttttatcaccttggagaaaaatgagggcctgatcatgaaagctg  
660 cgagagaaggatgtgttcggaacgcagcgtgccatttgacataagtagacgggagacctacgtgttttattttcagGAA  
661 TCAATGTGCAATCATTGACTCAAATGGCATGCGATGCACGAATGATGGATGCTGAT  
662 GCCAGGGCAGCCACCGTGCAGACAATTGCAGGGCACATGGAAGACGCTCTTGAA  
663 ATTCAACGAGAGgtctgtggaagtcatgttgggaataacaaaatcaactctattttcagGTCACCGATGTG  
664 TCGGGCATGTGTGTCCAGAAGCGATGGGCAAACCTATGTGACATTACTATATGTATT  
665 TATTAATAATGCTCTACCTTGGAAATGTTGTATTACAAGTGTTTATGTTAAACAGTTTC  
666 CTTGGTACTGACAACCTTTTTTACGGCTTTCACATTTTGTGAGAGATTTGTTGAATGGT  
667 CGTGAATGGGAAGTTAGTGGGAACCTTCCACGTGTAACCTATGTGTGATTTTCGAGgta  
668 aaacaacgtggattagatcagtttaaaaaatgtttaagGTACGAGTACTGGGTAATGTGCATCATCA  
669 TACAGTCCAATGCGTGCTAATGATTAACATGTTTAATGAGAAAATATTTTTGTTCTT  
670 TGGTTCTGGTACTTCATGGTAGCTTTTGTGTCAGCAGTGTCCATGTTCCATTGGATT  
671 ATTATATCTTTCTTACCAGGACAGgtaaccgaaataccctttttatgattacttaactttgttttcattttccag  
672 CACATGAAGTTCATCAGAAAATATCTACGAGCTACAGATTTGGCAACTGACAGGCA  
673 GTCGGTGAAAAAGTTTGTTCACAAGTTCCTCGGATATGATGGAGtatgttatgattttcgaaac  
674 acttactaacaagatgtatttagGTGTTTTGTATGAGAATGATTTTCGGCACATGCTGGAGATAT  
675 TCTTGCTACAGAACTAATTGTTGCTCTGTGGCATAACTTCAATGATCGTGTGTCAGGAA  
676 Ggtgagctaataagatcggctaagttgctgattggtttgcttcaataagttttcattctaattcaaccagcaatagtattca  
677 atttttattttcatttttcaacaacctgaaacaaaatcaattaaagacaaaaaaaccacgacagatcgaataag  
678 tcaaatgagtgccgacgaatccaatccctaaaggcatacatttctattgtttccagaatttcgagcaagtctctgagcagta  
679 gacgcaaatacctccaacagcgttctatctctatctatcaatgttggttttccattctaagttagctttgtctgaaaaaaat  
680 ggcggccgccccctggaaacgcataacagcctatcaaaactcactaaccagttatagttttgtgtccaccatccaccgaag  
681 tgccttagtgattgattcgattcttggccattcaactgatttttgccttggtttcattttcgccgtcacacactgcactattttttta  
682 aaacgttggatcccagttccacgttgcaaaaagcaaaagtggtgtaactcaagaattgaaattcaagaaagattatctg  
683 gattgaataaattctaatttccctttccaattcacacttacacattcacatacacattttccctcttctcctcctaactcacaca  
684 gtcactcacacacactgtatcgtaatctgtgatttttttctccaattacagtataatcgaatataaagtgtagaagactgcatg  
685 atccgtttagaattaatagtcggatctgaaactaacacacaactttctatcattttcatggctactgtagtagtctttcata  
686 gtgcctgtgttgcgctgtgatgggtggtcatgtgtgaaaaatcttctaattttaaaactgtgcattctgaaaaaaagtttcca  
687 aacattatactgaatcaagttttagaacaattttgtgaacaagtaaaaggtaactgtacaatcatcgaaacgaga  
688 ccactcatacaatcggataagcacaacacgcaattttctgcaagaataattcgattgaatttttgccttccattgtaaccgatt  
689 tgaagatacaattcaactcaacggaatccctcaaccactaaccaccacaactcaccactacctccagccaacacgtagt  
690 ccgaaccgggttttggttccataacagagtaacacagcgagagtcagttgtatgtagctgatctttttcggaaatgcactct  
691 cttttatattttgaacctattttgtcgacaatttgccttctcaccatttatcaccatgatcccaccatcaggcgggtggcatgc  
692 aattagattagatgtactcaccggtgtgcctggcttctgttttcttctgtttttctgactttcaacaatctgtctgcacaaattgt  
693 ttactctgaaaacctggtccgattctgtatcgaatatgtaacaacgatatgctgcccctaaattcctatgtttcccgtttgaa  
694 aaatttgatataattctataatttgagaagtaaaaaagaatgcatgaaaaaacgaatttaataattcagtgctatattact  
695 tgagtctccaaccaagactgctttgtttcattagtgactacattgattttgattccttgattttgatttgataccaaccgatttt

696 caaggggtggcaaaacgcaatgaatgcctgtgtgacagggcgtcctacaaatffcattagataacctaaaacgcttgc  
697 acttacagAGTCCAATCGAGATGTTCTGAAGGCGGTGTCACTCAGTCACCTAGCAAATT  
698 AGACGCCAATTTCAAACGTGGCTTCTCGGCCAGACGAGGgtgagtgcaagatggacacatgta  
699 ctgacacgctgacatgtgaaaattgcaaaattagacttcagctgtcaacgtgttttgtttcaagtacgtgatagtaattgt  
700 aatgtcaaagtatagtatggatgtgctgtgtgacggcaaaactgttagggtttgaacttgctttaaaagttagatgta  
701 aatgttaaataatattcaaagtctcttctcattgttagaaacaaactatTTTTttaaacttaaagcagggctgtgcggaagttaga  
702 tcaaatttgcaatgCGgtttcattgtatagatttaccctaaactagtcattggcgcaaagtatgtagaaaaacatgCGcac  
703 aagtttgc aaatacttttagccaaccagctgactgagagcgaataaataTTTTttaaatttctgacgaagaagtgcaca  
704 acttattcaacctattcaaattctataattgttctcaaattaattttgcaacacaataaaaagtttaaatatgctctagcagctc  
705 aatttaccagccatgatcagaattatcgtataaaaataaattcaaagcagaataactagttgacttttatttatgaagaacata  
706 tcttattttcaaaaacattaagagctccaaaagtaaagctcaaaaattgagaggaaattctatgCGaactttttaacaatt  
707 caaaataaatgacaagttcacaaccattattagtgattagctagcagacagaaaagctcttagtgctcGcaaaaatgtg  
708 aaaaattttgacaaaatgtaaaatcctagaatagttgagcgagagcgcactgattggtcGagcctgtgtttgtgtattgCag  
709 ggCGgaggccaacgggggctctCGgtctgtctgctcGtaatgtggCGccttctGcccccaagtgcagaatcccaat  
710 catcctacaccgtgtgtcctcacttcaagttggaattgaattgcagGGCAAGCCGCCCTTCGACGGCTCA  
711 AATCCGACGCGTGGAAGAAACGCCGAAAATCAGATGGTTACTTCACGTTTCGTCTA  
712 AtatcttgacttcaactattcaacctcccagttcttctcacttctcatctaaaccgaccagtggtgctcGcctatcgtccac  
713 atcttcaattatttgataatgtatttctgtgccatttcatgttttattcaattttcaaatgtttgtttattttggtgaatttagttcG  
714 aatattccaactttataaccaaataattgtacaaagcattatgaaatgtgcataagttctctgaatcattcaaatccctg  
715 ggtacttttgcaccccgctctgaaacaaaattgagcacagctctgttctacctttcccatccccagtgccaatatttaggtg  
716 ctctcttccaagaaatctcaaaactcacacatcgacacgccataaacctttgtaaaccttaccCAAatcaaaaaaaag  
717 ctgagtgaaattctagtcattgtgtgacagccccttctcccaactatttctgacccttttctgacaaatgttgactatttaatt  
718 gtcttctcaaaaaaatacctttgtgaactgcacttctcaatttcaaaaacgatacagtgactgtttatagcgggtaataag  
719 gcaacgtgcagtaatccattctaataagtttaggcactataacttaatcgtatttctgattttcttctcatctaaattataggaat  
720 tttcaaaatttcaaaattgtccctttcaaatctcttaggaatttttctatacaattttcatcgggtgatggtcccctctccctc  
721 tttcGcccccaacgacacaatttttttcaaatttaggaattttccctttcttcttctattggattttcatttcttccatcgggtg  
722 ctgagataacaattattaccttcataatccatcaattacaaaagaacctaaactttccaatgcatttacct**ATAACTT**  
723 **CGTATAGCATACATTATACGAAGTTATAAAATGGTGAGTGTGTCTAAGGGCGAAG**  
724 **AGCTGATTAAGGAGAACATGCACATGAAGCTGTACATGGAGGGCACCGTGAACA**  
725 **ACCACCCTTCAAGTGCACATCCGAGGGCGAAGGCAAGCCCTACGAGGGCAC**  
726 **CAGACCATGAGAATCAAGGTGGTCGAGGGCGGgtaagtttaacatatataactaactaacc**  
727 **ctgattatttaattttcagCCCTCTCCCCTTCGCTTCGACATCCTGGCTACCAGCTTCAT**  
728 **GTACGGCAGCAGAACCTTCATCAACCACACCCAGGGCATCCCCGACTTCTTTAA**  
729 **GCAGTCTTCCCTGAGGGCTTCACATGGGAGAGAGTCACCACATACGAAGACGG**  
730 **GGCGTGCTGACCGCTACCCAGGACACCAGCCTCCAGGACGGCTGCCTCATCTA**  
731 **CAACGTCAAGATCAGAGGGGTGAACCTCCCATCCAACGGgtaagtttaacagttcgggtac**  
732 **taactaaccatacatattttaaattttcagCCCTGTGATGCAGAAGAAAACACTCGGCTGGGAG**  
733 **GCCAACACCGAGATGCTGTACCCCGCTGACGGCGGCCTGGAAGGCAGAAcCGA**  
734 **CATGGCCCTGAAGCTCGTGGGCGGGGCCACCTGATCTGCAACTTCAAGACCAC**  
735 **ATACAGATCCAAGAAACCCGCTAAGAACCTCAAGATGCCCGGCGTCTACTATGT**  
736 **GGACCACAGACTGGAAAGAATCAAGGAGGgtaagtttaacatgattttactaactaactaatctg**  
737 **attttaaattttcagCCGACAAAGAGACCTACGTGAGCAGCACGAGGTGGCTGTGGCC**  
738 **AGATACTGCGACCTCCCTAGCAAACCTGGGGCACAACTTAATTCGGGAtaaGGAT**

739 GATCGACGCCaACGTCGTTGAATTTTCAAATTTTAAATACTGAATATTTGTTTTTTT  
740 TCCTATTATTTATTTATTCTCTTTGTGTTTTTTTTCTTGCTTTCTAAAAAATTAATTCA  
741 ATCCAAATCTAAacatttttttctcttccgctcctccaattcgattccgctcctctcatctgaacacaatgtgc  
742 aagtttatttatcttctcgtttcatttcatttaggacgtggggggaattggtggaagggggaaacacacaaaaggat  
743 gatggaaatgaaataaggacacacaatatgcaacaacattcaattcagaaatatggaggaagggttaaagaaa  
744 acataaaaatatagaggaggaaggaaaactagtaaaaaataagcaaagaaattaggcgaacgatgAGAA  
745 TTGTCCTCGCTTGGATTTTTGCTTTCGTCGTAAATCTACACACGCGTCTCTCCGT  
746 GCGAGAGTCCAAGCCAGCAGCCAAATTCGTTGACTGAGTATTCAACGTTTATACG  
747 TTGTCGGCAACGAGAAATAGGAAAATGCATCGGGAAATGTTCTTTTTTCGATTTTT  
748 TCCAAGGTTTTGACAAATTTTACCACGAATTTTGCTATGTTTTCAATTA AAAAATAT  
749 GTTATTCAACTGTTTCTATGAGGAAAATAAGGCTTTGCATGTAATTTTCTTATTCA  
750 GCATAATTTTTAATTAATTTGAATTTTCTGTCCTAACGTTTATTTTGTTCCTTGTT  
751 ATGACTGATCTGAAATTAATTTTTGAATTTTAAGGTAATATGTCAGGCGGTGCCGC  
752 AAGTTTGTACAAAAAAGCAGGCTCCATGAAAAAGCCTGAACTCACCGCGACGTC  
753 TGTCGAGAAGTTTCTGATCGAAAAGTTCGACAGCGTCTCCGACCTGATGCAGCTC  
754 TCGGAGGGCGAAGAATCTCGTGCTTTCAGCTTCGATGTAGGAGGGCGTGGATAT  
755 GTCCTGCGGGTAAATAGCTGCGCCGATGGTTTCTACAAAGATCGTTATGTTTATC  
756 GGC ACTTTGCATCGGCCGCGCTCCCGATTCCGGAAGTGCTTGACATTGGGGAAT  
757 TCAGCGAGAGCCTGACCTATTGCATCTCCCGCCGTGCACAGGGTGTACAGTTGC  
758 AAGACCTGCCTGAAACCGAACTGCCCGCTGTTCTGCAGCCGGTCGCGGAGGCCA  
759 TGGATGCGATCGCTGCGGCCGATCTTAGCCAGACGAGCGGGTTCGGCCCATTCG  
760 GACCGCAAGGAATCGGTCAATACACTACATGGCGTGATTTCATATGCGCGATTG  
761 CTGATCCCATGTGTATCACTGGCAAACCTGTGATGGACGACACCGTCAGTGCGT  
762 CCGTCGCGCAGGCTCTCGATGAGCTGATGCTTTGGGCCGAGGACTGCCCCGAAG  
763 TCCGGCACCTCGTGACGCGGATTTCCGGCTCCAACAATGTCCTGACGGACAATG  
764 GCCGCATAACAGCGGTCATTGACTGGAGCGAGGCGATGTTCCGGGGATTCCCAAT  
765 ACGAGGTCGCCAACATCTTCTTCTGGAGGCCGTGGTTGGCTTGTATGGAGCAGC  
766 AGACGCGCTACTTCGAGCGGAGGCATCCGGAGCTTGCAGGATCGCCGCGGCTC  
767 CGGGCGTATATGCTCCGCATTGGTCTTGACCAACTCTATCAGAGCTTGGTTGACG  
768 GCAATTTGATGATGCAGCTTGGGCGCAGGGTCGATGCGACGCAATCGTCCGAT  
769 CCGGAGCCGGGACTGTCGGGCGTACACAAATCGCCCGCAGAAGCGCGGCCGTC  
770 TGGACCGATGGCTGTGTAGAAGTACTCGCCGATAGTGGAACCGACGCCCCAGC  
771 ACTCGTCCGAGGGCAAAGGAATAGACCCAGCTTTCTTGTACAAAGTGGGTCCAA  
772 TTACTCTTCAACATCCCTACATGCTCTTTCTCCCTGTGCTCCCACCCCTATTTTTG  
773 TTATTATCAAAAACTTCTCTTAATTTCTTTGTTTTTTAGCTTCTTTTAAGTCACCTC  
774 TAACAATGAAATTGTGTAGATTCAAAAATAGAATTAATTCGTAATAAAAAGTCGA  
775 AAAAAATTGTGCTCCCTCCCCCATTAAATAATAATTCTATCCCAAAATCTACACAA  
776 TGTTCTGTGTACACTTCTTATGTTTTTTACTTCTGATAAATTTTTTTGAAACATCATA  
777 GAAAAAACCGCACACAAAATACCTTATCATATGTTACGTTTCAGTTTATGACCGC  
778 AATTTTTAcagaggtagtttcttatttgggaatttgcattgtgcatttctgctcccattttctgcaaaaataaaat  
779 gttctaaattttgatgtttaaatttttttcaattttaaagaatattcattgattgaaaaatcataaatcaaaattctacatcaa  
780 atatgaatttaaacattcgctgattgaaaaaatcactgagaaatagattgaagcaaaaataattttaaagacaaaaaaaatg  
781 aatcaacaatactgagatgatggaaaatgtttaaacagatctgcaaagtccgaggaatcgtaataatgttccgatgaagttg

782 ccataccacgtaattctttcatattcaaacctgctgatttgtctgtactgattccaaccgtgtacacaacaacgccttgctttaa  
783 gtgcttcttcgcctgaaatcttcagattctagaaaatcttagggtaacgctgaaagagcctaaatttgaacaagtgatttgc  
784 ggcacgcacattcaggtgaaaacccgatgacgggtgtgtcccataactatgcccttattaataatacattacggcttaaac  
785 atcctagtcagtgtacgggtactagaaggcatgaa

## 786 **Genotyping protocols**

787

### 788 Genotyping the *inx-1(tm3524)* X allele:

789 *inx1\_tm\_F*: GCCTGTCAGTTGCCAAATCT  
790 *inx1\_tm\_R1*: GCAGTGTCCATGTTCCATTG  
791 *inx1\_tm\_R2*: ATGTGTGTCCAGAAGCGATG

792 Anneal at 55°C, elongate for 1 min at 72°C. Run amplified products on a 2% agarose  
793 gel. Homozygous wild-type will produce 542bp & 159bp bands, homozygous *inx-*  
794 *1(tm3524)* X will produce a single 304bp band, and a heterozygous *inx-1(+tm3524)* X  
795 will produce three bands at 542bp, 304bp & 159bp.

796

### 797 Primer set for *inx-1* exome sequencing:

798 *ex1\_inx1\_F*: CGGCACGGATGAAGTAGTTT  
799 *ex1\_inx1\_R*: TTGGTTTCATCTCCCGTTTC  
800 *ex1\_inx1* product: 576bp

801 *ex2\_inx1\_F*: AGACGGGAGACCTACGTTGT  
802 *ex2\_inx1\_R*: CCGCAACTTAGCCGATCTTA  
803 *ex2\_inx1* product: 982bp

804 *ex3\_inx1\_F*: AAACACGCAATTTTCTGCAA  
805 *ex3\_inx1\_R*: CACACACGCACATCCATACA  
806 *ex3\_inx1* product: 994bp

807 *ex4\_inx1\_F*: CTGCTGTCTGCTCGCTAATG  
808 *ex4\_inx1\_R*: ACGTGGTCGGGTTAGATGAG  
809 *ex4\_inx1* product: 250bp

810 Anneal at 55°C, elongate for 1 min 15 seconds at 72°C. Send resulting products for  
811 Sanger Sequencing performed by GENEWIZ (Azenta Life Sciences).

812
